# Supplementary material
Source: PubMed Central journal article supplement (PMC3989653)
Supplement: embj0033-0594-sd4.pdf [file embj0033-0594-sd4.pdf]

## Supplemental Figure 2

**A**

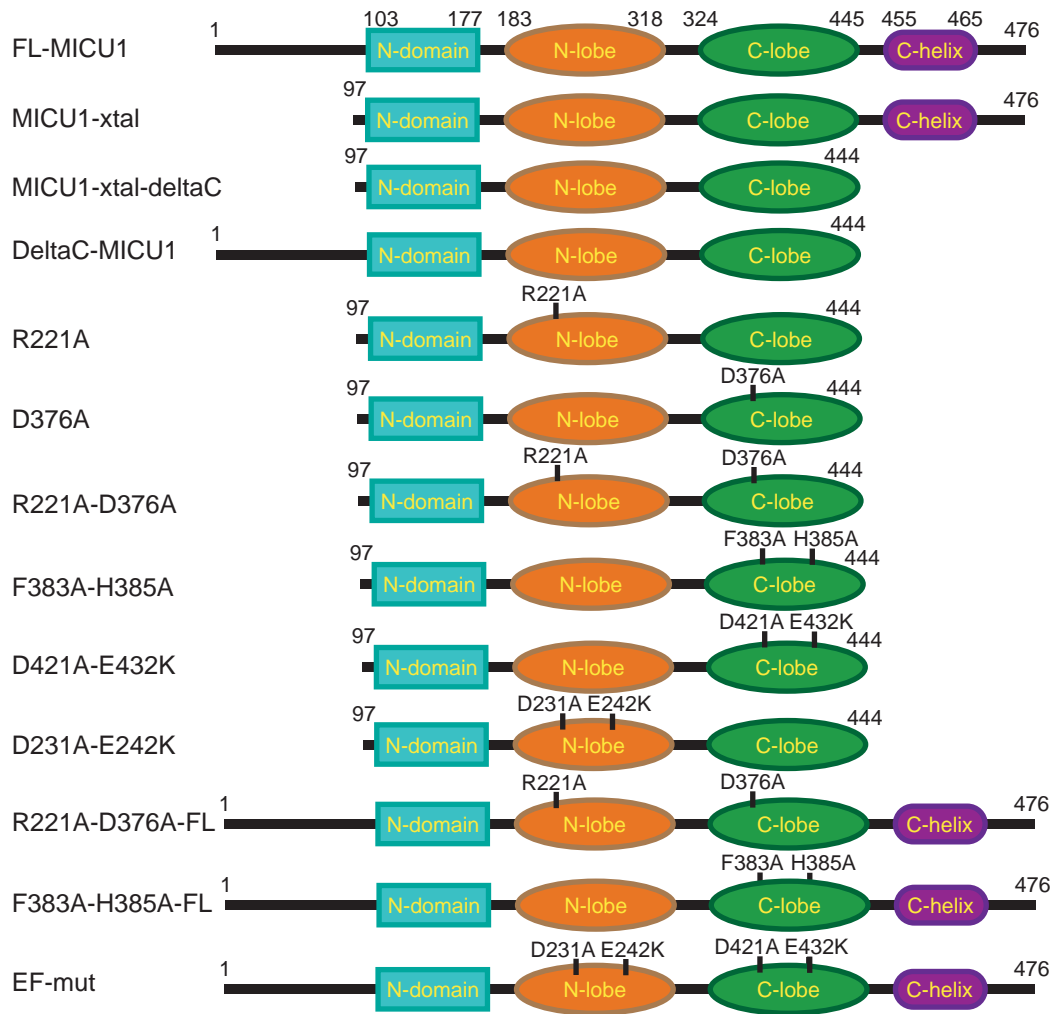

**B**

|            | 1          | 3        | 5        | 7         | 9         | 12        |          |          |          |          |          |          |          |            |
|------------|------------|----------|----------|-----------|-----------|-----------|----------|----------|----------|----------|----------|----------|----------|------------|
|            | <b>X</b>   | <b>Y</b> | <b>Z</b> | <b>-Y</b> | <b>-X</b> | <b>-Z</b> |          |          |          |          |          |          |          |            |
| <b>EF1</b> | <b>231</b> | <b>D</b> | <b>L</b> | <b>N</b>  | <b>G</b>  | <b>D</b>  | <b>G</b> | <b>E</b> | <b>V</b> | <b>D</b> | <b>M</b> | <b>E</b> | <b>E</b> | <b>242</b> |
| <b>EF4</b> | <b>421</b> | <b>D</b> | <b>C</b> | <b>D</b>  | <b>G</b>  | <b>N</b>  | <b>G</b> | <b>E</b> | <b>L</b> | <b>S</b> | <b>N</b> | <b>K</b> | <b>E</b> | <b>432</b> |

Construction of human MICU1 mutants. (A) A schematic diagram of the different MICU1 wild type and mutants used in this study. (B) The sequences of the two canonical EF-binding sites of MICU1 are shown. The conventional positions of the EF hand are shown above the sequences.
