# Supplementary material
Source: PubMed Central journal article supplement (PMC3989653)
Supplement: embj0033-0594-sd5.pdf [file embj0033-0594-sd5.pdf]

## Supplemental Figure 3

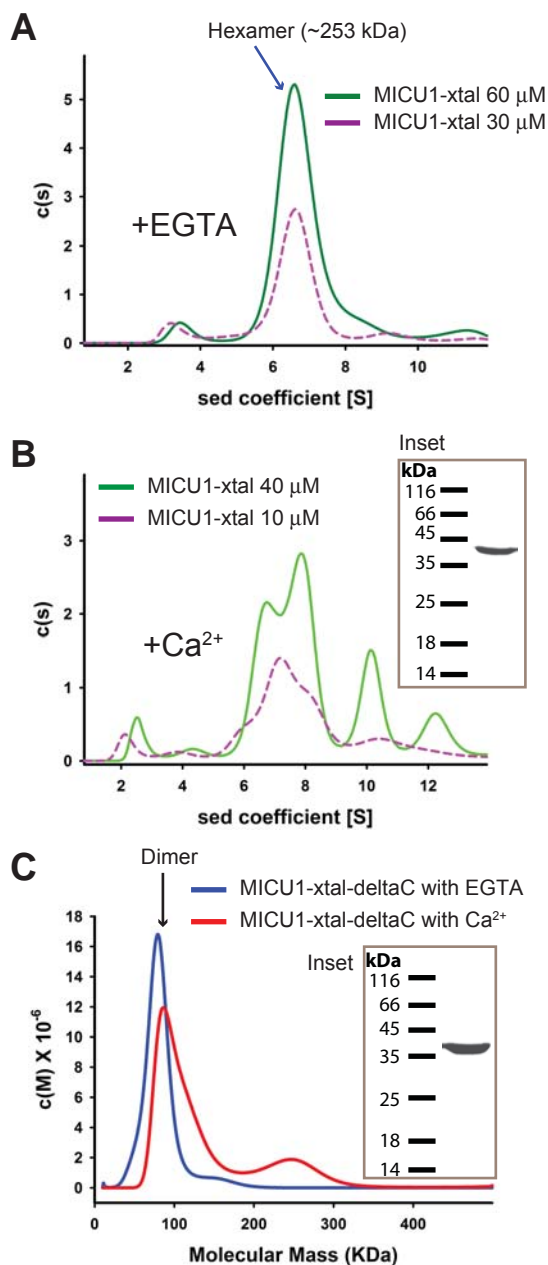

The oligomeric states of MICU1 proteins. Sedimentation velocity experiment of the MICU1-xtal molecules in the absence (A) or presence (B) of Ca<sup>2+</sup>. Two different concentrations of MICU1-xtal samples were applied in the experiment. Inset, 1  $\mu$ g of MICU1-xtal loaded on a 13% SDS-PAGE. (C) Sedimentation velocity experiment of the MICU1-xtal-deltaC molecules in the absence or presence of Ca<sup>2+</sup>. Inset, 1  $\mu$ g of MICU1-xtal-deltaC loaded on a 13% SDS-PAGE.
