# Supplementary material
Source: PubMed Central journal article supplement (PMC3989653)
Supplement: embj0033-0594-sd6.pdf [file embj0033-0594-sd6.pdf]

## Supplemental Figure 4

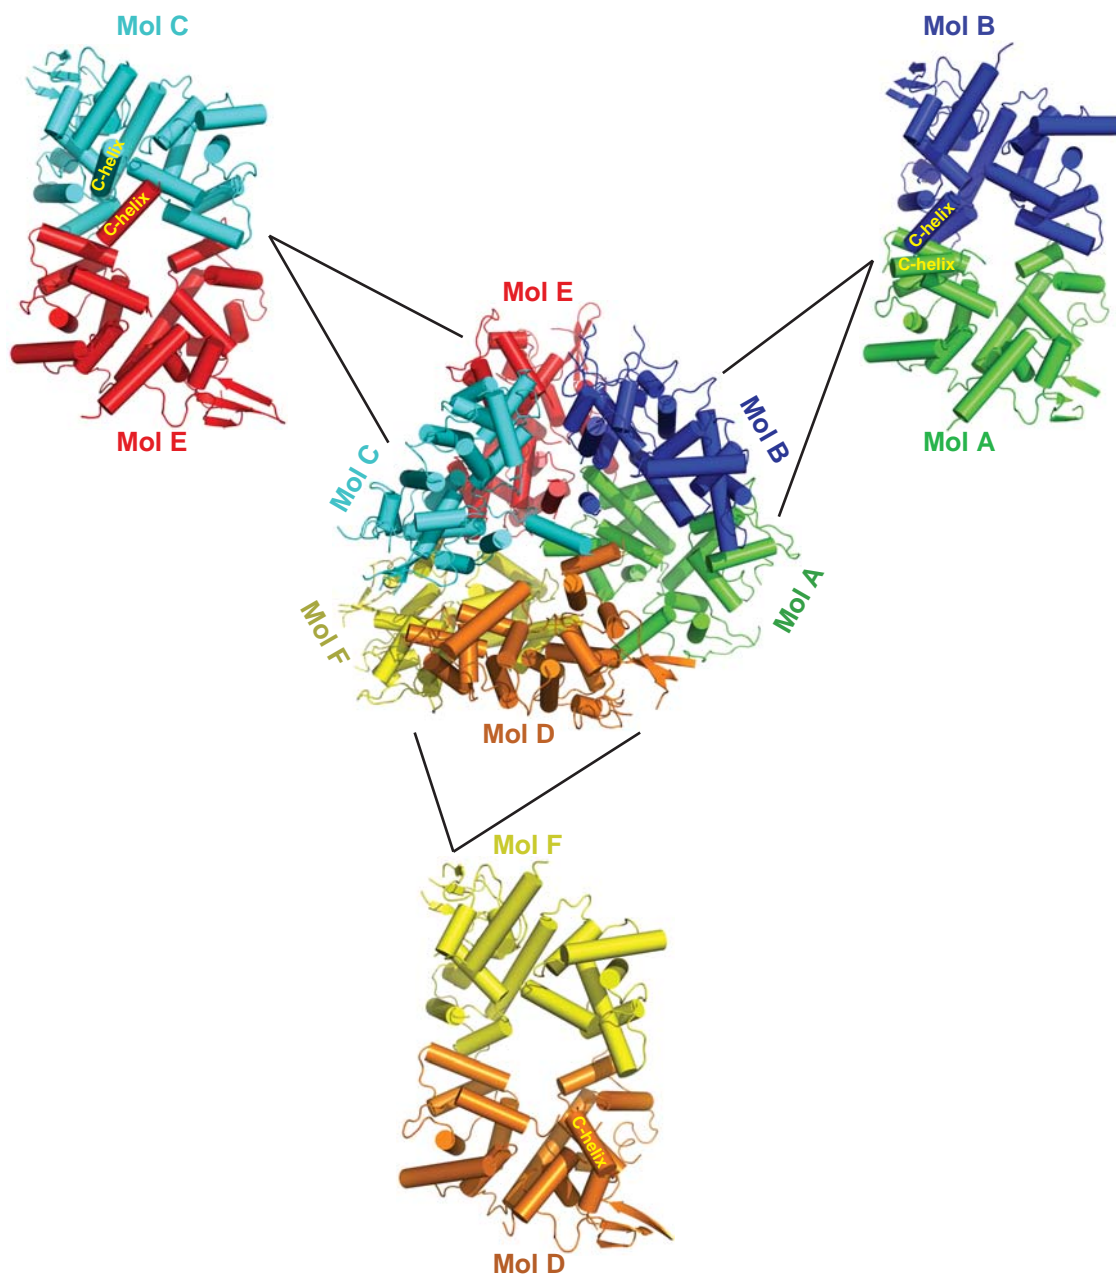

Hexamer of Ca<sup>2+</sup>-free MICU1. The entire hexamer is an approximated trimer of three dimers. Three dimers consisting of Mol C and Mol E, Mol B and Mol A as well as Mol F and Mol D are almost identical except for the orientation of the C-helices. The six molecules are colored cyan, blue, orange, red, green and yellow, respectively. The C-helix of each molecule is clustered in the center of the hexamer.
