# Supplementary material
Source: PubMed Central journal article supplement (PMC3989653)
Supplement: embj0033-0594-sd7.pdf [file embj0033-0594-sd7.pdf]

## Supplemental Figure 5

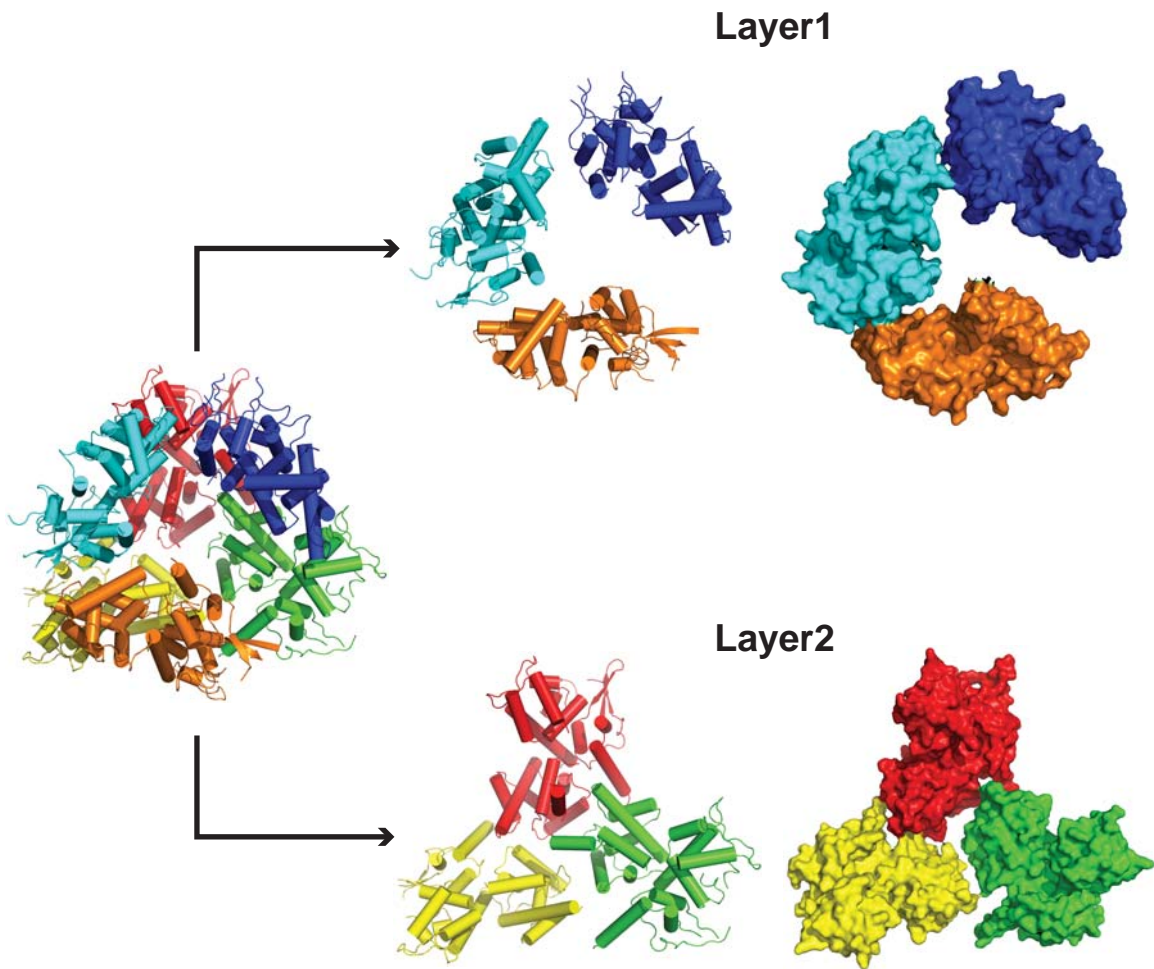

Packing of the Ca<sup>2+</sup>-free MICU1 hexamer. The upper layer1 consists of three molecules colored blue, cyan and orange. The bottom layer2 consists of three molecules colored red, yellow and green.
