# Supplementary material
Source: PubMed Central journal article supplement (PMC3989653)
Supplement: embj0033-0594-sd8.pdf [file embj0033-0594-sd8.pdf]

## Supplemental Figure 6

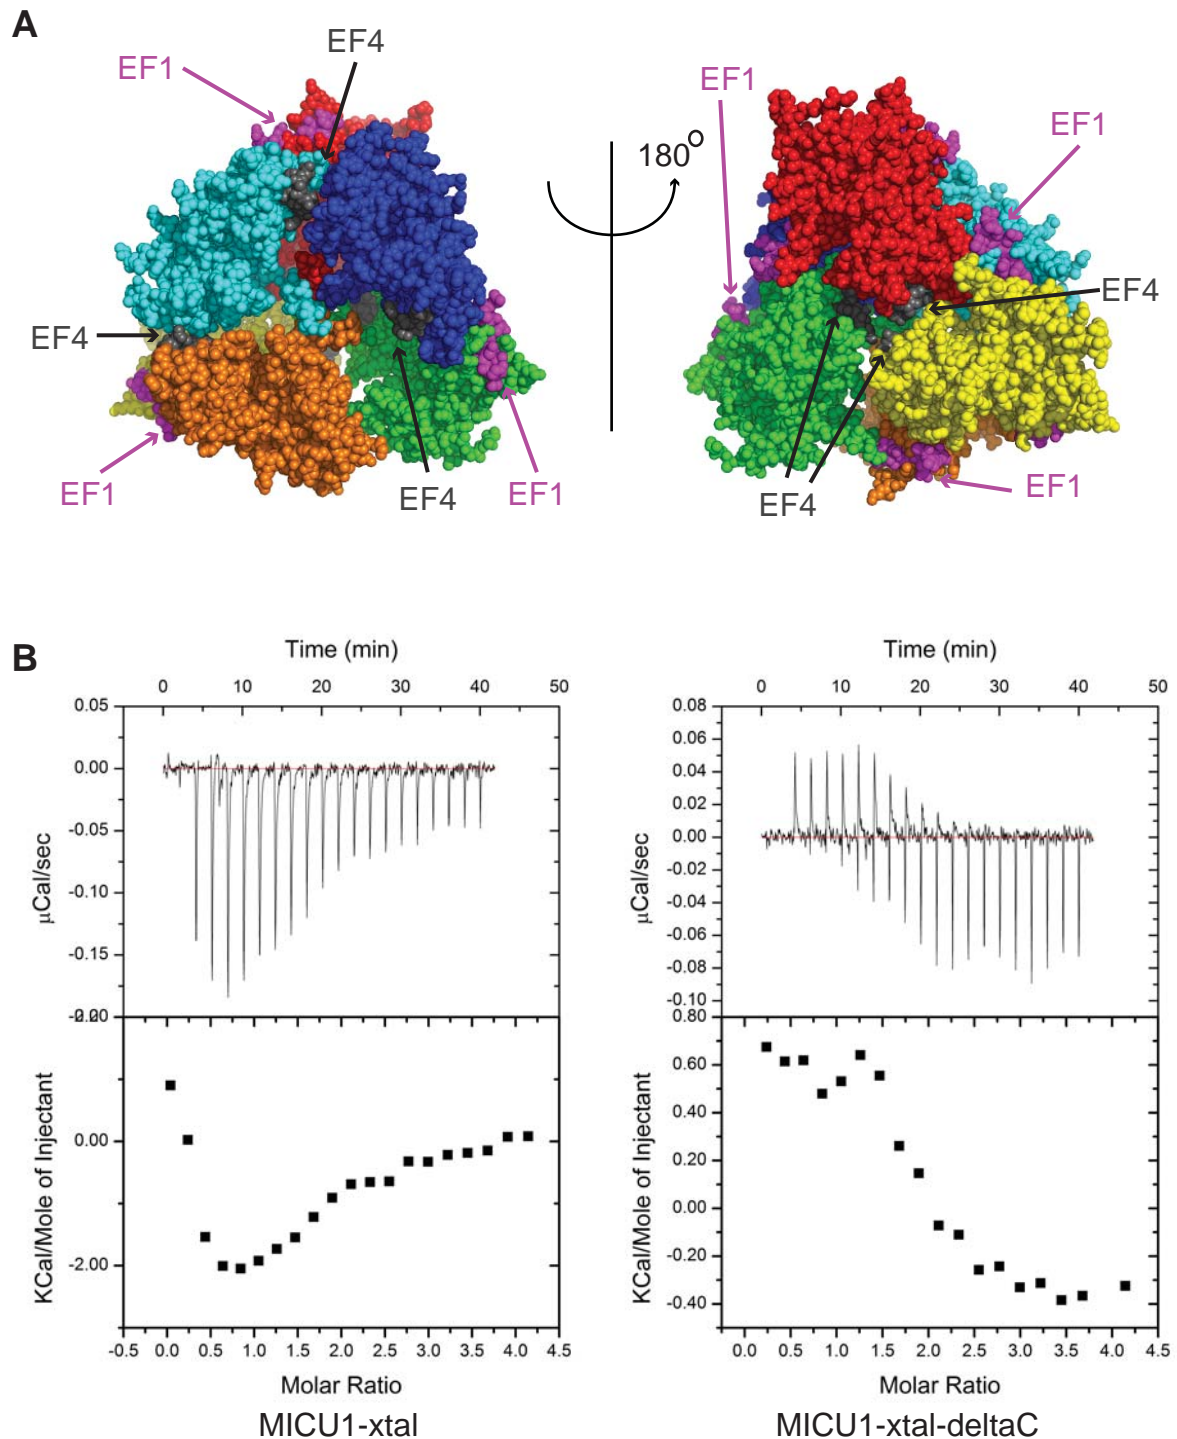

Characteristics of the EF sites of MICU1. (A) The location of the EF sites in the  $\text{Ca}^{2+}$ -free MICU1 hexamer depicted as a space-filling model. Six monomers are colored green, blue, cyan, orange, red and yellow, respectively. EF1 sites are colored purple, and EF4 sites are colored dark grey. (B) The dissociation constants of MICU1-xtal and MICU1-xtal-deltaC in the presence of calcium ions were determined using ITC.
