# Supplementary material
Source: PubMed Central journal article supplement (PMC3989653)
Supplement: embj0033-0594-sd9.pdf [file embj0033-0594-sd9.pdf]

## Supplemental Figure 7

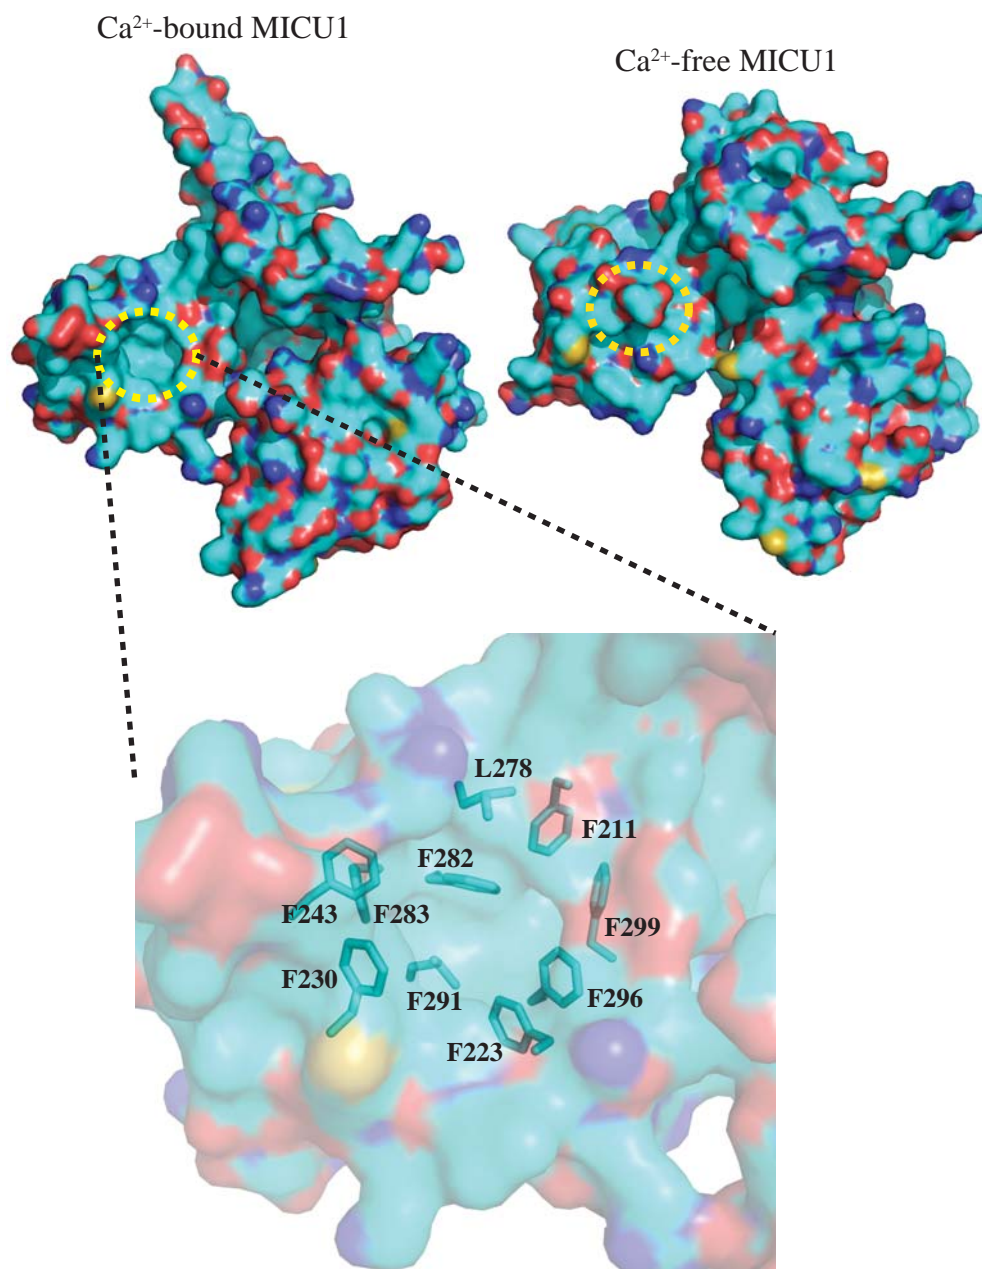

Comparison of the surface map of the Ca<sup>2+</sup>-bound MICU1 and the Ca<sup>2+</sup>-free MICU1 monomer. The oxygen, nitrogen, carbon and sulfur atoms are colored red, blue, cyan and yellow, respectively. Inset: Zoom-in view of the exposed hydrophobic pocket. The surface map is shown with transparency of 80%. Hydrophobic residues are shown in stick model and are colored cyan.
