# Supplementary material
Source: PubMed Central journal article supplement (PMC3989653)
Supplement: embj0033-0594-sd10.pdf [file embj0033-0594-sd10.pdf]

## Supplemental Figure 8

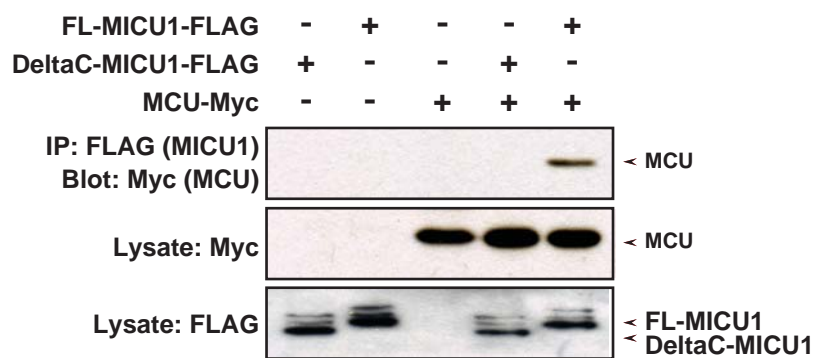

Western blots of coimmunoprecipitated wild type FL-MICU1 and mutant DeltaC-MICU1 with the MCU channel in the presence of  $\text{Ca}^{2+}$ .
