# Supplementary material
Source: PubMed Central journal article supplement (PMC3989653)
Supplement: embj0033-0594-sd11.pdf [file embj0033-0594-sd11.pdf]

## Supplemental Figure 9

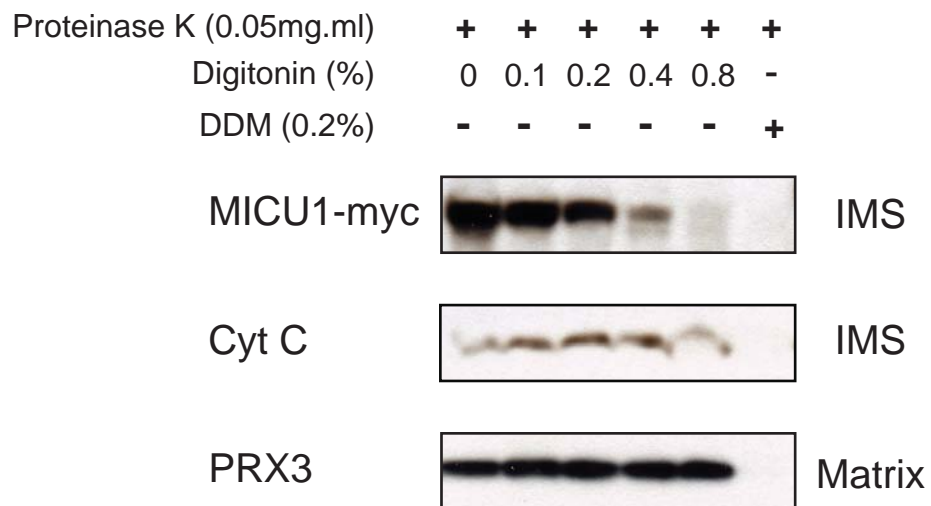

Mitochondria were treated with Proteinase K with increasing concentrations of detergent.
