# Supplementary material
Source: PubMed Central journal article supplement (PMC3989653)
Supplement: embj0033-0594-sd12.pdf [file embj0033-0594-sd12.pdf]

## Supplemental Figure 10

**A**

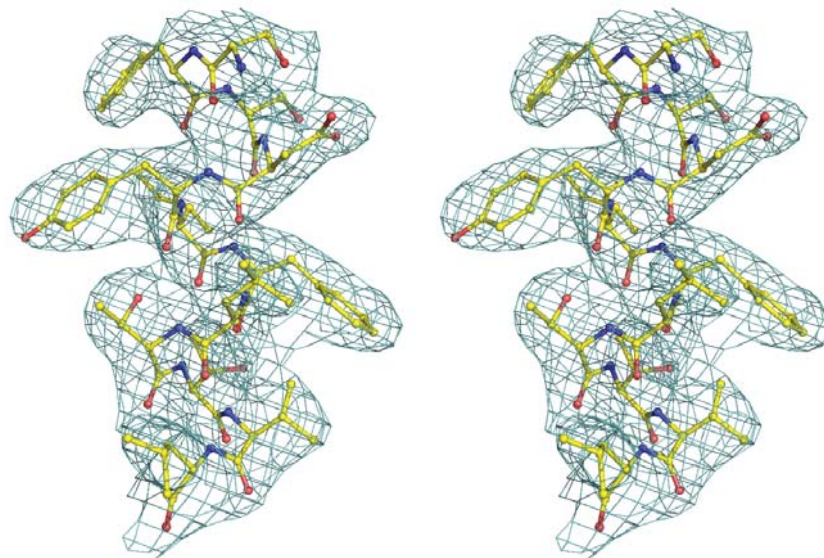

**B**

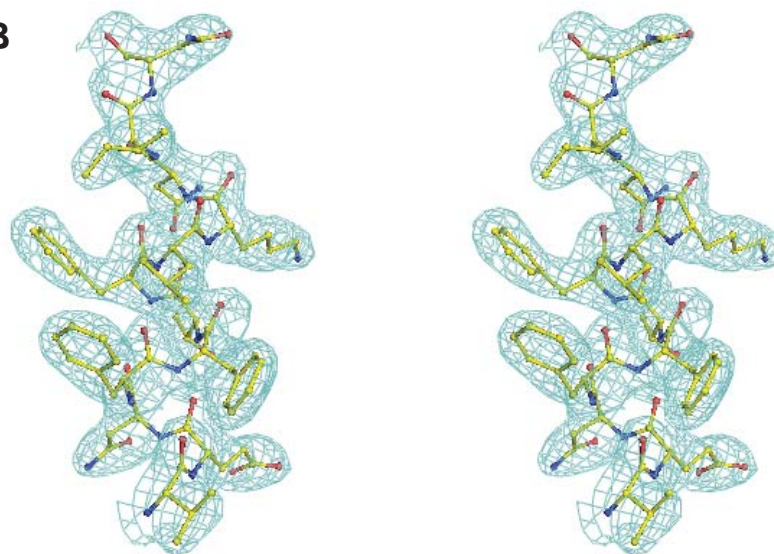

Stereoview of a portion of the  $2F_o-F_c$  electron density map of Ca<sup>2+</sup>-free (A) and Ca<sup>2+</sup>-bound (B) MICU1 structures.
