# Supplementary material
Source: PubMed Central journal article supplement (PMC3989653)

**Figure S3B**

**Figure S3C**

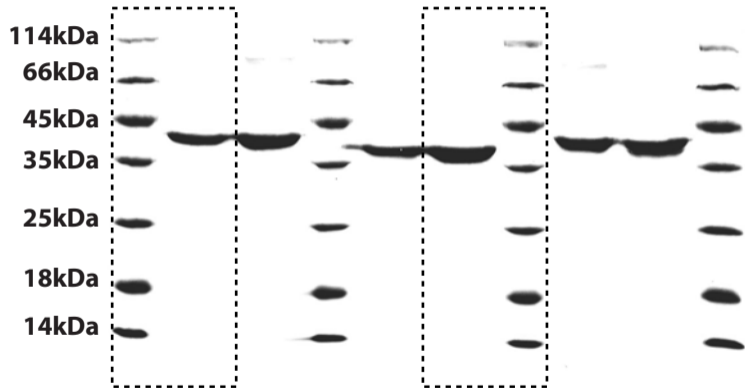

Supplement: embj0033-0594-sd13.pdf [file embj0033-0594-sd13.pdf]

**Figure S8, Top row**

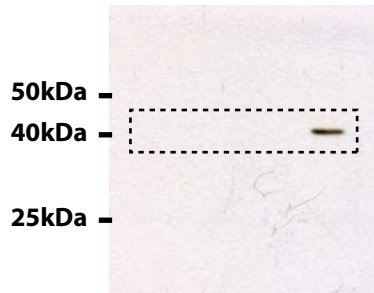

**Figure S8, Middle row**

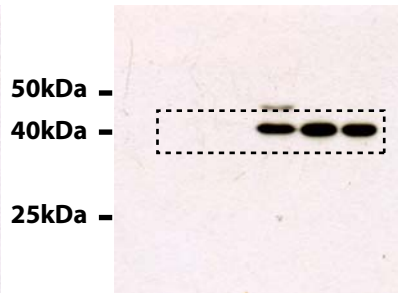

**Figure S8, Bottom row**

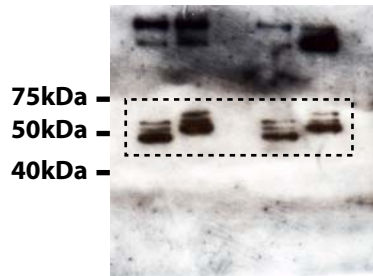

Supplement: embj0033-0594-sd14.pdf [file embj0033-0594-sd14.pdf]

**Figure S9, Top and Middle row**

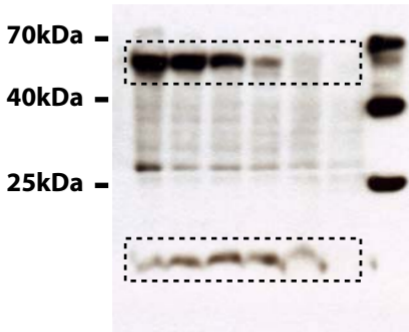

**Purified mitochondria**

## Figure S9, Bottom row

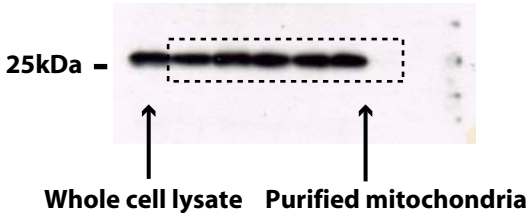

Supplement: embj0033-0594-sd15.pdf [file embj0033-0594-sd15.pdf]

**Figure 2H, Top row**

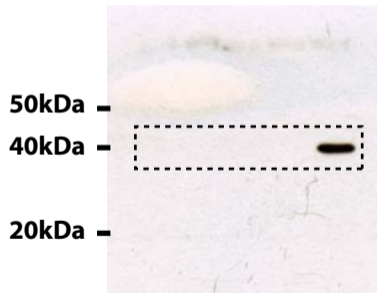

**Figure 2H, Middle row**

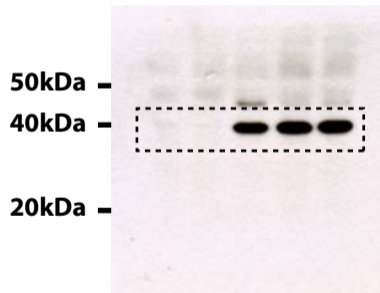

**Figure 2H, Bottom row**

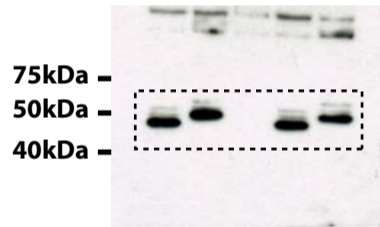

Supplement: embj0033-0594-sd2.pdf [file embj0033-0594-sd2.pdf]
